# Supplementary material for: Spectrum of Atazanavir-Selected Protease Inhibitor-Resistance Mutations
Source: MDPI journal article supplement (doi:10.3390/pathogens11050546), 2022-05-05
Supplement: s1 [file s1]

Table S3. Studies in PubMed containing sequences from previously PI-naïve patients receiving boosted or unboosted atazanavir (ATV) for which the sequences were not available.

| AuthorYr         | Trial          | #<br>Total<br>ATV | #<br>Boosted<br>ATV | #<br>Unboosted<br>ATV | %<br>Reported<br>DRMs <sup>1</sup> | Reported DRMs (n)                                                                                                                                                                                                                             |
|------------------|----------------|-------------------|---------------------|-----------------------|------------------------------------|-----------------------------------------------------------------------------------------------------------------------------------------------------------------------------------------------------------------------------------------------|
| Dolling13        |                | 322               | 251                 | 71                    | 1.9                                | I50L (3); I84V (2); N88S (1)                                                                                                                                                                                                                  |
| Wallis20         | ACTG A5288     | 170               | 170                 | 0                     | 40.0                               | Not Listed                                                                                                                                                                                                                                    |
| Lambert-Niclot18 |                | 113               | 95                  | 18                    | 3.5                                | L33F+I50L (1); M46I+N88S (1)<br>G48V+I54L+G73T+V82T+I84V (1);<br>L33F+F53L+I54L+A71V+V82T+I84V+L90M (1);                                                                                                                                      |
| Marcelin14       |                | 90                | 90                  | 0                     | 3.3                                | N88S (2); I50L (1)                                                                                                                                                                                                                            |
| Teófilo16        | REMAIN         | 85                | 85                  | 0                     | 0                                  |                                                                                                                                                                                                                                               |
| Molina10         | CASTLE         | 39                | 39                  | 0                     | 7.7                                | I50L (1); V32I+M46I+I84V (1)<br>L10F+V32I+K43T+M46I+A71I+G73S+I85I/V+L90M (1);                                                                                                                                                                |
| Chawana17        | ATF            | 28                | 28                  | 0                     | 35.7                               | I50L (1); A71T (1); L90M (1); M46I (1);<br>Q58E+V82M (1); A71I/T+N88S+L10V (1);<br>L10F+M46I+Q58E+A71I+I84V (1);<br>I50L+V82M+V32I+L24I+N83D (1);<br>M46I+I50L+L10V+L33F+I47V+A71V+G73C/S+V82A (1);<br>V82M+A71V+L24I+K43T+F53L+I54V+T74P (1) |
| Soriano11        | ARTEN          | 28                | 28                  | 0                     | 0                                  |                                                                                                                                                                                                                                               |
| Palumbo18        | HPTN 052       | 28                | 2                   | 26                    | 0                                  |                                                                                                                                                                                                                                               |
| Gallant13        | GS-US-216-0114 | 24                | 24                  | 0                     | 0                                  |                                                                                                                                                                                                                                               |
| Kulkarni17       | WAVES          | 21                | 21                  | 0                     | 0                                  |                                                                                                                                                                                                                                               |
| Kulkarni14       | GS-US-236-0103 | 19                | 19                  | 0                     | 0                                  |                                                                                                                                                                                                                                               |
| Kumar09          | ACTION         | 16                | 16                  | 0                     | 0                                  |                                                                                                                                                                                                                                               |
| Stebbing07       |                | 16                | 16                  | 0                     | 0                                  |                                                                                                                                                                                                                                               |
| Malan10          | BMS AI424-089  | 10                | 2                   | 8                     | 40.0                               | N83N/D (1); I50IL (1); I50I/L+G73G/S (1);<br>I50L+N88N/S+K20K/I/T+L33F (1)                                                                                                                                                                    |
| Slama16          | IMEA 040 DATA  | 9                 | 9                   | 0                     | 22.2                               | M46I+N88S (1); D30N+N88D (1)                                                                                                                                                                                                                  |
| Elion08          |                | 8                 | 8                   | 0                     | 0                                  |                                                                                                                                                                                                                                               |
| Squires10        | ARIES          | 8                 | 8                   | 0                     | 0                                  |                                                                                                                                                                                                                                               |
| Castain19        |                | 6                 | 6                   | 0                     | 0                                  |                                                                                                                                                                                                                                               |

|                  |          |   |   |   |      |               |
|------------------|----------|---|---|---|------|---------------|
| Kozal12          | SPARTAN  | 6 | 1 | 5 | 0    |               |
| Martinez15       | ATADAR   | 6 | 6 | 0 | 0    |               |
| Mills13          | A4001078 | 6 | 6 | 0 | 0    |               |
| Obasa20          |          | 6 | 6 | 0 | 33.3 | Not listed    |
| Elion08          |          | 5 | 5 | 0 | 0    |               |
| Landman10        |          | 4 | 0 | 4 | 0    |               |
| Orrell17         | ARIA     | 4 | 4 | 0 | 0    |               |
| Pujari18         |          | 4 | 4 | 0 | 25.0 | M46I+N88T (1) |
| Karlström07      |          | 3 | 3 | 0 | 0    |               |
| Ross10           | ALERT    | 3 | 3 | 0 | 0    |               |
| Lambert-Niclot10 |          | 2 | 2 | 0 | 0    |               |
| Bartlett13       |          | 1 | 1 | 0 | 0    |               |
| Mahomed20        |          | 1 | 1 | 0 | 0    |               |

<sup>1</sup>DRMs (drug resistance mutations) were defined as those with a Stanford HIV drug resistance program penalty score for ≥1 PI.
