# Supplementary material for: Spectrum of Atazanavir-Selected Protease Inhibitor-Resistance Mutations
Source: MDPI journal article supplement (doi:10.3390/pathogens11050546), 2022-05-05
Supplement: s1 [file s1]

Text S1. The Euresist Network Study Group is formed by:

Francesca Incardona,  
Rolf Kaiser,  
Thomas Lengauer,  
Anders Sönnnerborg,  
Maurizio Zazzi,  
Ana Abecasis.  
Marina Bobkova,  
Carole Devaux,  
Miłosz Parczewski,  
Nico Pfeifer,  
Michal Rosen-Zvi,  
Murat Sayan,  
Antonia Bezenchek,  
Giulia DI Teodoro
