# Supplementary material for: Spectrum of Atazanavir-Selected Protease Inhibitor-Resistance Mutations
Source: MDPI journal article supplement (doi:10.3390/pathogens11050546), 2022-05-05
Supplement: s1 [file s1]

Table S2. Nonpolymorphic PI treatment-selected mutations (NP-TSMs) occurring in  $\geq 1$  sequences from patients receiving boosted or unboosted atazanavir (ATV) as their first PI.

| NP-TSM <sup>1</sup>                                                                                                                                                     | % in Patients with NP-TSMs (n=149) | % With DRMs <sup>2</sup> | % In Patients receiving boosted or unboosted ATV (n=1497) | % In PI-naïve Patients (n=61597) <sup>1</sup> |
|-------------------------------------------------------------------------------------------------------------------------------------------------------------------------|------------------------------------|--------------------------|-----------------------------------------------------------|-----------------------------------------------|
| 89T                                                                                                                                                                     | 34.9                               | 71.2                     | 3.5                                                       | 0.00                                          |
| 55R                                                                                                                                                                     | 15.4                               | 87                       | 1.5                                                       | 0.26                                          |
| 85V                                                                                                                                                                     | 11.4                               | 88.2                     | 1.1                                                       | 0.00                                          |
| 71I                                                                                                                                                                     | 9.4                                | 100                      | 0.9                                                       | 0.10                                          |
| 34Q                                                                                                                                                                     | 7.4                                | 81.8                     | 0.7                                                       | 0.08                                          |
| 22V                                                                                                                                                                     | 4.7                                | 57.1                     | 0.5                                                       | 0.07                                          |
| 92R                                                                                                                                                                     | 4                                  | 50                       | 0.4                                                       | 0.01                                          |
| 95F                                                                                                                                                                     | 3.4                                | 100                      | 0.3                                                       | 0.16                                          |
| 34D                                                                                                                                                                     | 3.4                                | 80                       | 0.3                                                       | 0.02                                          |
| 66V                                                                                                                                                                     | 3.4                                | 80                       | 0.3                                                       | 0.09                                          |
| 72L                                                                                                                                                                     | 3.4                                | 60                       | 0.3                                                       | 0.00                                          |
| 34N                                                                                                                                                                     | 2.7                                | 100                      | 0.3                                                       | 0.06                                          |
| 53I                                                                                                                                                                     | 2.7                                | 75                       | 0.3                                                       | 0.09                                          |
| 66F                                                                                                                                                                     | 2.7                                | 100                      | 0.3                                                       | 0.33                                          |
| 72K                                                                                                                                                                     | 2.7                                | 75                       | 0.3                                                       | 0.02                                          |
| 45I                                                                                                                                                                     | 2                                  | 100                      | 0.2                                                       | 0.00                                          |
| 79A                                                                                                                                                                     | 2                                  | 66.7                     | 0.2                                                       | 0.06                                          |
| 53Y                                                                                                                                                                     | 1.3                                | 100                      | 0.1                                                       | 0.00                                          |
| 71L                                                                                                                                                                     | 1.3                                | 100                      | 0.1                                                       | 0.01                                          |
| 51A                                                                                                                                                                     | 1.3                                | 100                      | 0.1                                                       | 0.12                                          |
| 10Y                                                                                                                                                                     | 1.3                                | 100                      | 0.1                                                       | 0.00                                          |
| 91S                                                                                                                                                                     | 1.3                                | 100                      | 0.1                                                       | 0.06                                          |
| 43Q                                                                                                                                                                     | 1.3                                | 0                        | 0.1                                                       | 0.02                                          |
| 55N                                                                                                                                                                     | 1.3                                | 100                      | 0.1                                                       | 0.00                                          |
| 43N                                                                                                                                                                     | 1.3                                | 0                        | 0.1                                                       | 0.01                                          |
| 96S                                                                                                                                                                     | 1.3                                | 0                        | 0.1                                                       | 0.01                                          |
| 89P                                                                                                                                                                     | 0.7                                | 100                      | 0.1                                                       | 0.00                                          |
| 67L                                                                                                                                                                     | 0.7                                | 100                      | 0.1                                                       | 0.02                                          |
| 10R                                                                                                                                                                     | 0.7                                | 100                      | 0.1                                                       | 0.05                                          |
| 33M                                                                                                                                                                     | 0.7                                | 100                      | 0.1                                                       | 0.02                                          |
| 43I                                                                                                                                                                     | 0.7                                | 100                      | 0.1                                                       | 0.00                                          |
| 45Q                                                                                                                                                                     | 0.7                                | 100                      | 0.1                                                       | 0.01                                          |
| 74E                                                                                                                                                                     | 0.7                                | 100                      | 0.1                                                       | 0.00                                          |
| <sup>1</sup> NP-TSMs were defined in the previous study, Rhee et. al, 2016 and the prevalence of each NP-TSM in PI-naïve patients was reported in the same publication. |                                    |                          |                                                           |                                               |

<sup>2</sup>DRMs (drug resistance mutations) were defined as those with a Stanford HIV drug resistance program penalty score for  $\geq 1$  PI.
